# Supplementary material for: Paper-based human neutrophil elastase detection device for clinical wound monitoring
Source: Royal Society of Chemistry journal article supplement (doi:10.1039/d0lc00062k), 2020-01-01
Supplement: d0lc00062k4.pdf [file d0lc00062k4.pdf]

## Supporting Information

### Paper-based Human Neutrophil Elastase Detection Device for Clinical Wound Monitoring

Ting Yang,<sup>a</sup> Shin-Chen Pan,<sup>b,c,\*</sup> and Chao-Min Cheng<sup>d,\*</sup>

<sup>a</sup>Department of Chemistry, National Tsing Hua University, No.101, Sec. 2, Guangfu Rd.,  
East Dist., Hsinchu City, Taiwan

<sup>b</sup>Division of Plastic and Reconstructive Surgery, Department of Surgery, National Cheng  
Kung University Hospital, College of Medicine, National Cheng Kung University,  
Tainan, Taiwan

<sup>c</sup>International Center for Wound Repair and Regeneration, National Cheng Kung  
University, Tainan, Taiwan

<sup>d</sup>Institute of Biomedical Engineering and Frontier Research Center on Fundamental and  
Applied Sciences of Matters, National Tsing Hua University, No.101, Sec. 2,  
Guangfu Rd., East Dist., Hsinchu City, Taiwan

\*E-mail: pansc@mail.ncku.edu.tw (S.-C. Pan); chaomin@mx.nthu.edu.tw (C.-M. Cheng)

#### **This SI file includes:**

Figures S1 to S2

Table S1 to S2

Legends for Movies S1 to S3

#### **Other supplementary materials for this manuscript include the following:**

Movies S1 to S3

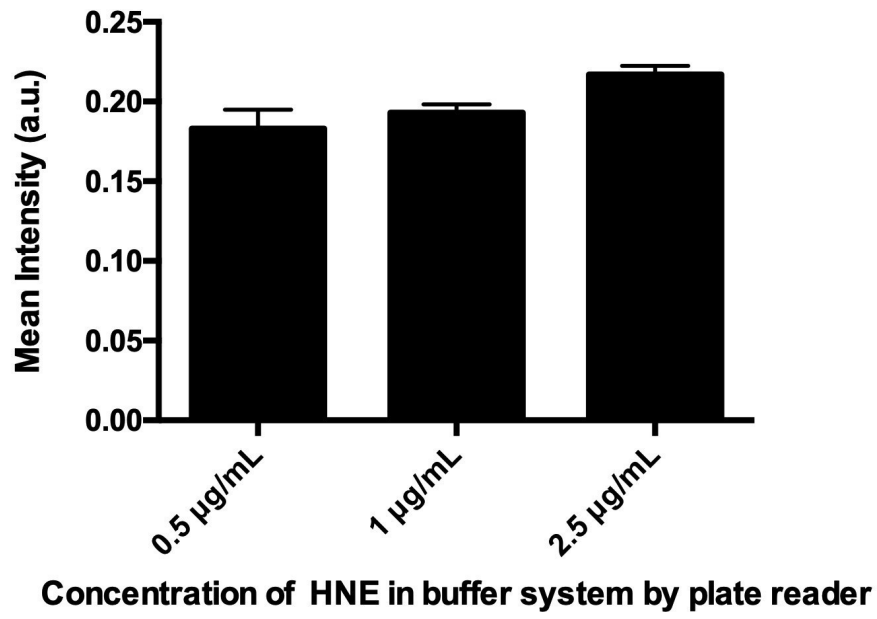

**Fig. S1.** The colorimetric intensity of human neutrophil elastase (HNE) concentration in a buffer system as detected by plate reader. (mean $\pm$ SD, n=3)

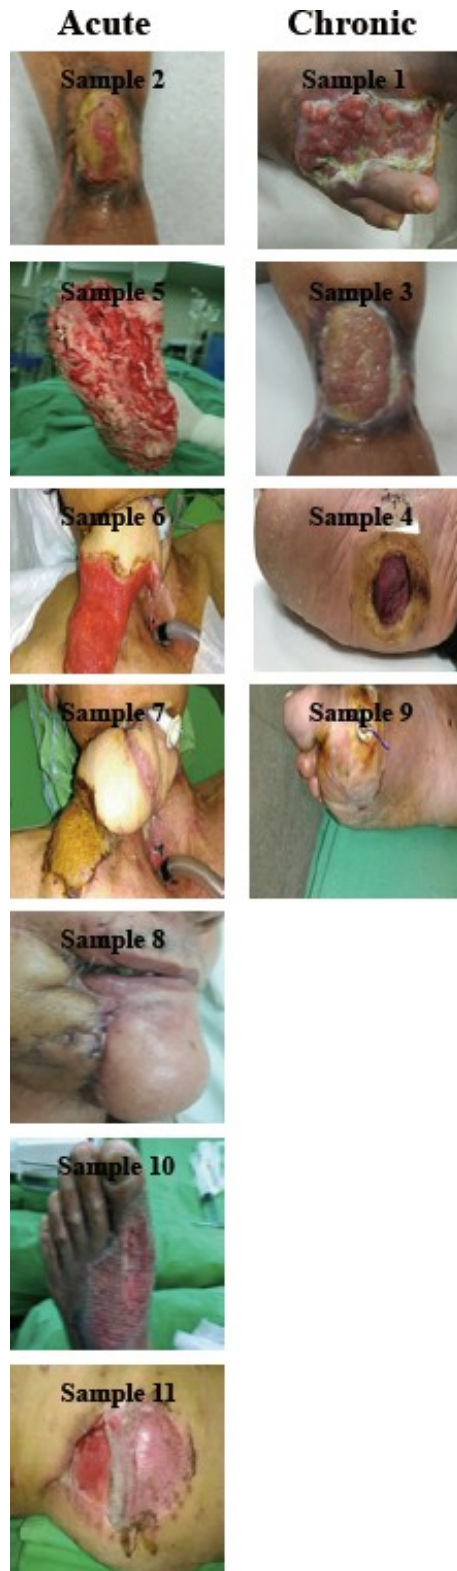

**Fig. S2.** Pictures of patient wound sites. Left column represents pictures of acute wounds and right column represents pictures of chronic wounds. Patient information can be found in Table 2 of the main text.



**Table S2.** The inter-assay coefficient variation value for HNE in a tear system.

| Conc.<br>( $\mu\text{g/mL}$ ) | Mean Intensity of HNE (a.u.) |                 |                 | Average | SD   | CV(%) |
|-------------------------------|------------------------------|-----------------|-----------------|---------|------|-------|
|                               | 1 <sup>st</sup>              | 2 <sup>nd</sup> | 3 <sup>rd</sup> |         |      |       |
| 25                            | 51.14                        | 58.34           | 44.85           | 51.44   | 6.63 | 12.89 |
| 10                            | 47.56                        | 52.28           | 40.50           | 46.78   | 6.71 | 14.34 |
| 5                             | 26.29                        | 32.13           | 33.71           | 30.71   | 4.96 | 16.15 |
| Average                       |                              |                 |                 |         |      | 14.46 |

Movie S1. The different absorption properties of Whatman filter paper (left) and chromatography paper (right) for HNE detection in buffer system. Each of the reaction zones contain 3  $\mu\text{L}$  pNA and 3  $\mu\text{L}$  HNE.

Movie S2. Demonstration of the paper device prototype for HNE detection in a buffer system.

Movie S3. Demonstration of the PEDD for actual clinical usage.
